# Supplementary material for: In vitro and in vivo activities of the carbonic anhydrase inhibitor, dorzolamide, against vancomycin-resistant enterococci
Source: PeerJ. 2021 Mar 30;9:e11059. doi: 10.7717/peerj.11059 (PMC8018244; doi:10.7717/peerj.11059)
Supplement: Supplemental Information 2 [file peerj-09-11059-s002.xlsx]

## Sheet: Sheet1
	Count 1	Count 2	Count 3	Count 4	Log Count 1	Log Count 2	Log Count 3	Log Count 4	Average	StDev
0 hours	4500000	5500000	4750000	5250000	6.65321	6.74036	6.67669	6.72016	6.69761	0.0397697
2 Hours
DMSO	32500000	32500000	37500000	30000000	7.51188	7.51188	7.57403	7.47712	7.51873	0.0403455
Dorzolamide	5500000	7500000	6500000	6000000	6.74036	6.87506	6.81291	6.77815	6.80162	0.0572259
Linezolid	2000000	2250000	2250000	3000000	6.30103	6.35218	6.35218	6.47712	6.37063	0.0749781
4 Hours
DMSO	325000000	525000000	350000000	225000000	8.51188	8.72016	8.54407	8.35218	8.53207	0.150874
Dorzolamide	7500000	7750000	7000000	9500000	6.87506	6.8893	6.8451	6.97772	6.8968	0.0570103
Linezolid	4500000	2750000	3000000	5250000	6.65321	6.43933	6.47712	6.72016	6.57246	0.135583
6 Hours
DMSO	475000000	625000000	450000000	675000000	8.67669	8.79588	8.65321	8.8293	8.73877	0.0868552
Dorzolamide	10500000	8000000	7750000	8250000	7.02119	6.90309	6.8893	6.91645	6.93251	0.0601507
Linezolid	3000000	3750000	5000000	5500000	6.47712	6.57403	6.69897	6.74036	6.62262	0.120033
8 Hours
DMSO	1000000000	750000000	1000000000	250000000	9	8.87506	9	8.39794	8.81825	0.28633
Dorzolamide	4500000	7750000	9000000	8250000	6.65321	6.8893	6.95424	6.91645	6.8533	0.136026
Linezolid	2500000	4500000	4500000	4250000	6.39794	6.65321	6.65321	6.62839	6.58319	0.124052
12 Hours
DMSO	750000000	750000000	1250000000	750000000	8.87506	8.87506	9.09691	8.87506	8.93052	0.110924
Dorzolamide	3750000	6250000	3250000	7500000	6.57403	6.79588	6.51188	6.87506	6.68921	0.17381
Linezolid	5500000	7250000	7000000	7500000	6.74036	6.86034	6.8451	6.87506	6.83021	0.0611379
24 Hours
DMSO	1000000000	250000000	500000000	500000000	9	8.39794	8.69897	8.69897	8.69897	0.24579
Dorzolamide	10000000	15000000	15000000	12500000	7	7.17609	7.17609	7.09691	7.11227	0.0836397
Linezolid	1750000	4250000	1500000	5500000	6.24304	6.62839	6.17609	6.74036	6.44697	0.279258
